# Supplementary material for: Mapping Genomic Adaptation to Environmental Heterogeneity in Indian Native Goat Populations through Landscape Genomics
Source: Research Square preprint supplement (doi:10.21203/rs.3.rs-7508489/v1), 2025-09-08
Supplement: Supplementary file 1 [file a69d79920c5cbc17d0183d78.docx]

**SUPPLEMENTARY TABLE**

**Table S1: Biopredictor variables (BIO1-19)**

| **S. No** | **Bioclimatic variable** | **Detail** |
| --- | --- | --- |
| **1** | **BIO1** | Annual Mean Temperature |
| **2** | **BIO2** | Mean Diurnal Range (Mean of monthly (max temp - min temp)) |
| **3** | **BIO3** | Isothermality ((BIO2/BIO7) *100) |
| **4** | **BIO4a** | Temperature Seasonality (Coefficient of Variation) |
| **5** | **BIO5** | Max Temperature of Warmest Month |
| **6** | **BIO6** | Min Temperature of Coldest Month |
| **7** | **BIO7** | Temperature Annual Range (BIO5-BIO6) |
| **8** | **BIO8** | Mean Temperature of Wettest Quarter |
| **9** | **BIO9** | Mean Temperature of Driest Quarter |
| **10** | **BIO10** | Mean Temperature of Warmest Quarter |
| **11** | **BIO11** | Mean Temperature of Coldest Quarter |
| **12** | **BIO12** | Annual Precipitation |
| **13** | **BIO13** | Precipitation of Wettest Month |
| **14** | **BIO14** | Precipitation of Driest Month |
| **15** | **BIO15** | Precipitation Seasonality (Coefficient of Variation) |
| **16** | **BIO16** | Precipitation of Wettest Quarter |
| **17** | **BIO17** | Precipitation of Driest Quarter |
| **18** | **BIO18** | Precipitation of Warmest Quarter |
| **19** | **BIO19** | Precipitation of Coldest Quarter |

**Table S2: Ancestry coefficients, and their PCA score of each individual**

| S.No | Animal No. | K1 | K2 | K3 | K4 | K5 | K6 | K7 | K8 | **PC score** |
| --- | --- | --- | --- | --- | --- | --- | --- | --- | --- | --- |
| 1 | ASL16 | 0.00001 | 0.00001 | 0.00001 | 0.00001 | 0.00001 | 0.99993 | 0.00001 | 0.00001 | **0.345** |
| 2 | ASL18 | 0.04375 | 0.00001 | 0.17563 | 0.21983 | 0.15103 | 0.188548 | 0.137934 | 0.083246 | **0.425** |
| 3 | ASL19 | 0.00001 | 0.00001 | 0.99993 | 0.00001 | 0.00001 | 0.00001 | 0.00001 | 0.00001 | **0.305** |
| 4 | ASL20 | 0.00001 | 0.00001 | 0.94648 | 0.00001 | 0.00001 | 0.00001 | 0.00001 | 0.053455 | **0.485** |
| 5 | ASL21 | 0.00001 | 0.00001 | 0.00001 | 0.99993 | 0.00001 | 0.00001 | 0.00001 | 0.00001 | **0.365** |
| 6 | ASL22 | 0.00001 | 0.00001 | 0.00001 | 0.34651 | 0.00001 | 0.65129 | 0.00001 | 0.002147 | **0.445** |
| 7 | ASL23 | 0.00001 | 0.000013 | 0.00001 | 0.99992 | 0.00001 | 0.00001 | 0.00001 | 0.00001 | **0.225** |
| 8 | ASL24 | 0.06319 | 0.068288 | 0.17615 | 0.17575 | 0.13995 | 0.23217 | 0.144466 | 0.00001 | **0.905** |
| 9 | ASL30 | 0.00001 | 0.00001 | 0.00001 | 0.99992 | 0.00001 | 0.00001 | 0.00001 | 0.00001 | **0.985** |
| 10 | CHA1 | 0.40046 | 0.00001 | 0.00001 | 0.00001 | 0.46483 | 0.00001 | 0.134649 | 0.00001 | **0.265** |
| 11 | CHA10 | 0.84797 | 0.00001 | 0.00001 | 0.00001 | 0.00001 | 0.00001 | 0.12499 | 0.026986 | **0.445** |
| 12 | CHA11 | 0.00001 | 0.00001 | 0.00001 | 0.00001 | 0.00001 | 0.00001 | 0.99993 | 0.00001 | **0.225** |
| 13 | CHA2 | 0.00001 | 0.00001 | 0.00001 | 0.00001 | 0.98358 | 0.00001 | 0.00001 | 0.016353 | **0.305** |
| 14 | CHA3 | 0.00001 | 0.00001 | 0.00001 | 0.00001 | 0.38824 | 0.00001 | 0.611691 | 0.00001 | **0.385** |
| 15 | CHA5 | 0.00001 | 0.00001 | 0.00001 | 0.00001 | 0.00001 | 0.00001 | 0.99993 | 0.00001 | **0.465** |
| 16 | CHA6 | 0.12834 | 0.03973 | 0.02653 | 0.02151 | 0.45832 | 0.056709 | 0.268823 | 0.00001 | **0.545** |
| 17 | CHA7 | 0.00001 | 0.00001 | 0.00001 | 0.00001 | 0.00001 | 0.00001 | 0.953503 | 0.04643 | **0.625** |
| 18 | CHA8 | 0.00001 | 0.00001 | 0.00353 | 0.00001 | 0.32281 | 0.00001 | 0.673533 | 0.000079 | **0.205** |
| 19 | CHA9 | 0.05299 | 0.02497 | 0.02841 | 0.00655 | 0.50842 | 0.027379 | 0.35125 | 0.00001 | **0.385** |
| 20 | JAK1 | 0.02557 | 0.24057 | 0.07289 | 0.00001 | 0.06504 | 0.434596 | 0.082149 | 0.079164 | **0.265** |
| 21 | JAK10 | 0.00001 | 0.20352 | 0.19693 | 0.00882 | 0.00001 | 0.500839 | 0.02052 | 0.069347 | **0.445** |
| 22 | JAK2 | 0.00906 | 0.22974 | 0.09956 | 0.01050 | 0.07041 | 0.398111 | 0.081902 | 0.100706 | **0.025** |
| 23 | JAK3 | 0.00001 | 0.00001 | 0.00001 | 0.00001 | 0.00001 | 0.995278 | 0.00001 | 0.004662 | **0.105** |
| 24 | JAK4 | 0.00001 | 0.99993 | 0.00001 | 0.00001 | 0.00001 | 0.00001 | 0.00001 | 0.00001 | **0.185** |
| 25 | JAK5 | 0.00001 | 0.844975 | 0.00001 | 0.00001 | 0.00001 | 0.00001 | 0.00001 | 0.154962 | **0.265** |
| 26 | JAK6 | 0.00001 | 0.226146 | 0.09621 | 0.00001 | 0.06595 | 0.44426 | 0.077173 | 0.090236 | **0.345** |
| 27 | JAK7 | 0.00001 | 0.739478 | 0.00001 | 0.00001 | 0.00001 | 0.201622 | 0.00001 | 0.05885 | **0.425** |
| 28 | JAK8 | 0.00001 | 0.00001 | 0.00001 | 0.00001 | 0.00001 | 0.99993 | 0.00001 | 0.00001 | **0.505** |
| 29 | JAK9 | 0.02784 | 0.07397 | 0.17573 | 0.16736 | 0.08431 | 0.384389 | 0.070052 | 0.016325 | **0.385** |
| 30 | JB100 | 0.00001 | 0.018385 | 0.07340 | 0.05717 | 0.13768 | 0.113746 | 0.109703 | 0.489893 | **0.665** |
| 31 | JB91 | 0.00001 | 0.00001 | 0.00001 | 0.00001 | 0.00001 | 0.00001 | 0.00001 | 0.99993 | **0.345** |
| 32 | JB95 | 0.00001 | 0.00001 | 0.00001 | 0.00001 | 0.00001 | 0.000015 | 0.00001 | 0.999925 | **0.425** |
| 33 | JB96 | 0.00001 | 0.00001 | 0.00001 | 0.00001 | 0.00001 | 0.00001 | 0.00001 | 0.999926 | **0.405** |
| 34 | JB97 | 0.00001 | 0.000014 | 0.00001 | 0.00001 | 0.00001 | 0.00001 | 0.00001 | 0.999926 | **0.985** |
| 35 | JB98 | 0.00001 | 0.00001 | 0.00001 | 0.00001 | 0.00001 | 0.00001 | 0.00001 | 0.99993 | **0.065** |
| 36 | JB99 | 0.00001 | 0.00001 | 0.00001 | 0.00001 | 0.00001 | 0.00001 | 0.00001 | 0.99993 | **0.145** |
| 37 | KAN12 | 0.00001 | 0.00001 | 0.00001 | 0.00001 | 0.99255 | 0.00001 | 0.00001 | 0.007384 | **0.225** |
| 38 | KAN19 | 0.00001 | 0.00001 | 0.00001 | 0.00001 | 0.85253 | 0.00001 | 0.147405 | 0.00001 | **0.305** |
| 39 | KAN2 | 0.09524 | 0.00001 | 0.00001 | 0.00001 | 0.19789 | 0.00001 | 0.00001 | 0.706808 | **0.385** |
| 40 | KAN22 | 0.00001 | 0.000018 | 0.00001 | 0.00001 | 0.37559 | 0.00001 | 0.00001 | 0.624341 | **0.465** |
| 41 | KAN3 | 0.00001 | 0.00001 | 0.00001 | 0.00001 | 0.39287 | 0.00001 | 0.00001 | 0.607062 | **0.545** |
| 42 | KAN31 | 0.00001 | 0.00001 | 0.00001 | 0.00001 | 0.35530 | 0.00001 | 0.00001 | 0.644631 | **0.625** |
| 43 | KAN34 | 0.00001 | 0.00001 | 0.00001 | 0.00001 | 0.35083 | 0.00001 | 0.00001 | 0.64911 | **0.205** |
| 44 | KAN38 | 0.16819 | 0.011529 | 0.03521 | 0.01015 | 0.30027 | 0.014612 | 0.460017 | 0.00001 | **0.085** |
| 45 | KAN5 | 0.00001 | 0.00001 | 0.00001 | 0.00001 | 0.48017 | 0.00001 | 0.00001 | 0.519761 | **0.265** |
| 46 | KAN8 | 0.00002 | 0.00001 | 0.00001 | 0.00001 | 0.00001 | 0.00002 | 0.00001 | 0.99991 | **0.345** |
| 47 | MAR1 | 0.00001 | 0.00001 | 0.99993 | 0.00001 | 0.00001 | 0.00001 | 0.00001 | 0.00001 | **0.025** |
| 48 | MAR10 | 0.03598 | 0.190736 | 0.13066 | 0.02358 | 0.11286 | 0.266663 | 0.118962 | 0.12054 | **0.105** |
| 49 | MAR11 | 0.05040 | 0.175774 | 0.12275 | 0.03767 | 0.10359 | 0.266121 | 0.117774 | 0.125892 | **0.185** |
| 50 | MAR2 | 0.00001 | 0.00001 | 0.83922 | 0.00001 | 0.00001 | 0.00001 | 0.00001 | 0.160716 | **0.265** |
| 51 | MAR3 | 0.00001 | 0.000011 | 0.00001 | 0.99992 | 0.00001 | 0.00001 | 0.00001 | 0.00001 | **0.345** |
| 52 | MAR4 | 0.00001 | 0.00001 | 0.00001 | 0.33761 | 0.00001 | 0.662327 | 0.00001 | 0.00001 | **0.425** |
| 53 | MAR5 | 0.00001 | 0.109126 | 0.06876 | 0.72087 | 0.02311 | 0.058508 | 0.019598 | 0.00001 | **0.505** |
| 54 | MAR6 | 0.04845 | 0.13378 | 0.14151 | 0.08224 | 0.11552 | 0.196572 | 0.162914 | 0.118995 | **0.585** |
| 55 | MAR7 | 0.00001 | 0.191822 | 0.00001 | 0.08385 | 0.00001 | 0.707739 | 0.016547 | 0.00001 | **0.265** |
| 56 | SAN76 | 0.00001 | 0.00001 | 0.00001 | 0.00001 | 0.92813 | 0.00001 | 0.00001 | 0.071805 | **0.445** |
| 57 | SAN77 | 0.72698 | 0.00001 | 0.00001 | 0.00001 | 0.27295 | 0.00001 | 0.00001 | 0.00001 | **0.325** |
| 58 | SAN78 | 0.00001 | 0.00001 | 0.00001 | 0.00001 | 0.64494 | 0.00001 | 0.355 | 0.00001 | **0.205** |
| 59 | SAN79 | 0.08861 | 0.020123 | 0.04015 | 0.00851 | 0.63474 | 0.029419 | 0.178415 | 0.00001 | **0.485** |
| 60 | SAN80 | 0.00001 | 0.00001 | 0.10621 | 0.00001 | 0.00001 | 0.00001 | 0.00001 | 0.893728 | **0.065** |
| 61 | SAN81 | 0.00001 | 0.00001 | 0.00001 | 0.00001 | 0.00001 | 0.00001 | 0.109667 | 0.890273 | **0.145** |
| 62 | SAN82 | 0.00001 | 0.00001 | 0.12304 | 0.00001 | 0.00001 | 0.00001 | 0.00001 | 0.876899 | **0.225** |
| 63 | SAN83 | 0.00001 | 0.00001 | 0.00001 | 0.00001 | 0.00001 | 0.00001 | 0.00001 | 0.99993 | **0.305** |
| 64 | SAN84 | 0.00001 | 0.00001 | 0.00001 | 0.00001 | 0.13079 | 0.075399 | 0.087651 | 0.706115 | **0.385** |
| 65 | SUR61 | 0.00001 | 0.00001 | 0.00001 | 0.00001 | 0.00001 | 0.99993 | 0.00001 | 0.00001 | **0.465** |
| 66 | SUR62 | 0.00001 | 0.99993 | 0.00001 | 0.00001 | 0.00001 | 0.00001 | 0.00001 | 0.00001 | **0.545** |
| 67 | SUR63 | 0.00001 | 0.99993 | 0.00001 | 0.00001 | 0.00001 | 0.00001 | 0.00001 | 0.00001 | **0.625** |
| 68 | SUR64 | 0.00488 | 0.226279 | 0.10124 | 0.00060 | 0.08014 | 0.443233 | 0.088296 | 0.055316 | **0.305** |
| 69 | SUR65 | 0.00001 | 0.00001 | 0.57835 | 0.00001 | 0.00001 | 0.421588 | 0.00001 | 0.00001 | **0.285** |
| 70 | SUR66 | 0.00001 | 0.890315 | 0.00001 | 0.00001 | 0.00001 | 0.000014 | 0.00001 | 0.109617 | **0.665** |
| 71 | SUR67 | 0.47954 | 0.009228 | 0.03479 | 0.04260 | 0.34456 | 0.052401 | 0.00001 | 0.036851 | **0.345** |
| 72 | SUR68 | 0.00001 | 0.00001 | 0.00001 | 0.00001 | 0.99992 | 0.00001 | 0.00001 | 0.00001 | **0.025** |
| 73 | SUR69 | 0.13457 | 0.009949 | 0.03271 | 0.04049 | 0.64740 | 0.03101 | 0.095845 | 0.008014 | **0.105** |
| 74 | SUR70 | 0.99993 | 0.00001 | 0.00001 | 0.00001 | 0.00001 | 0.00001 | 0.00001 | 0.00001 | **6.185** |
| 75 | T109 | 0.53360 | 0.00001 | 0.00001 | 0.00001 | 0.00001 | 0.00001 | 0.00001 | 0.466335 | **0.265** |
| 76 | T114 | 0.21108 | 0.00001 | 0.00001 | 0.00001 | 0.00001 | 0.00001 | 0.00001 | 0.788845 | **0.345** |
| 77 | T120 | 0.52175 | 0.00001 | 0.00001 | 0.00001 | 0.00001 | 0.00001 | 0.00001 | 0.47819 | **0.425** |
| 78 | T126 | 0.62593 | 0.00001 | 0.00001 | 0.00001 | 0.00001 | 0.00001 | 0.00001 | 0.374008 | **0.505** |
| 79 | T127 | 0.58536 | 0.00001 | 0.00001 | 0.00001 | 0.00001 | 0.00001 | 0.00001 | 0.414579 | **0.585** |
| 80 | T134 | 0.82027 | 0.00001 | 0.00001 | 0.00001 | 0.17966 | 0.00001 | 0.00001 | 0.00001 | **0.365** |
| 81 | T31 | 0.57219 | 0.00001 | 0.00001 | 0.00001 | 0.00001 | 0.00001 | 0.00001 | 0.427743 | **0.445** |
| 82 | T43 | 0.07467 | 0.027194 | 0.05178 | 0.04489 | 0.49025 | 0.04652 | 0.264667 | 0.00001 | **0.225** |
| 83 | UK1 | 0.00001 | 0.00001 | 0.00001 | 0.00001 | 0.65151 | 0.00001 | 0.348425 | 0.00001 | **0.505** |
| 84 | UK10 | 0.00001 | 0.00001 | 0.00001 | 0.00001 | 0.00001 | 0.00001 | 0.99993 | 0.00001 | **0.385** |
| 85 | UK2 | 0.00001 | 0.00001 | 0.00001 | 0.00001 | 0.00001 | 0.00001 | 0.99993 | 0.00001 | **0.065** |
| 86 | UK3 | 0.20623 | 0.043927 | 0.06245 | 0.03070 | 0.21535 | 0.064155 | 0.293806 | 0.083368 | **-0.145** |
| 87 | UK4 | 0.00001 | 0.00001 | 0.00001 | 0.00001 | 0.00001 | 0.00001 | 0.953625 | 0.046315 | **-0.225** |
| 88 | UK5 | 0.99993 | 0.00001 | 0.00001 | 0.00001 | 0.00001 | 0.00001 | 0.00001 | 0.00001 | **-0.305** |
| 89 | UK6 | 0.00001 | 0.00001 | 0.00001 | 0.00001 | 0.74124 | 0.00001 | 0.258695 | 0.00001 | **0.385** |
| 90 | UK7 | 0.07230 | 0.00001 | 0.00001 | 0.00001 | 0.46323 | 0.00001 | 0.429305 | 0.03512 | **-0.465** |
| 91 | UK8 | 0.85827 | 0.00001 | 0.00001 | 0.00001 | 0.00001 | 0.00001 | 0.141659 | 0.00001 | **-0.545** |
| 92 | UK9 | 0.00001 | 0.00001 | 0.00001 | 0.00001 | 0.97797 | 0.00001 | 0.00001 | 0.021961 | **-0.425** |
| 93 | sam1 | 0.00001 | 0.00001 | 0.00001 | 0.00001 | 0.00001 | 0.99993 | 0.00001 | 0.00001 | **-0.305** |
| 94 | sam12 | 0.04600 | 0.013194 | 0.10836 | 0.22882 | 0.07926 | 0.433652 | 0.086202 | 0.004487 | **-0.385** |
| 95 | sam13 | 0.00001 | 0.00001 | 0.00001 | 0.00001 | 0.00001 | 0.99993 | 0.00001 | 0.00001 | **-0.365** |
| 96 | sam14 | 0.00001 | 0.959846 | 0.00001 | 0.00001 | 0.00001 | 0.00001 | 0.00001 | 0.040094 | **0.445** |
| 97 | sam15 | 0.00001 | 0.99993 | 0.00001 | 0.00001 | 0.00001 | 0.00001 | 0.00001 | 0.00001 | **-0.025** |
| 98 | sam2 | 0.03549 | 0.120678 | 0.15327 | 0.16838 | 0.11531 | 0.292386 | 0.082295 | 0.032184 | **-0.105** |
| 9 | sam3 | 0.00001 | 0.128543 | 0.52033 | 0.01921 | 0.00001 | 0.331865 | 0.00001 | 0.00001 | **-0.185** |
| 100 | sam4 | 0.00001 | 0.00001 | 0.99993 | 0.00001 | 0.00001 | 0.00001 | 0.00001 | 0.00001 | **-0.265** |
| 101 | sam7 | 0.00001 | 0.00001 | 0.00001 | 0.99992 | 0.00001 | 0.00001 | 0.00001 | 0.00001 | **-0.345** |
| 102 | sam9 | 0.00001 | 0.025422 | 0.10156 | 0.28427 | 0.00001 | 0.587352 | 0.00001 | 0.001364 | **-0.425** |

Assam Hill(ASL), Changthangi (CHA), Jakhrana (JAK), Jharkhand Black (JB), Kahmi(sam), Kanni adu(KAN), Marwari(MAR), Sangamneri(SAN), Surti(SUR), Tellicherry(T), Uttarakhand local(UK)

**Table S3. 1 : KEGG pathways of genes found to be selected in West Coast Plains and Ghat Region (Tellicherry and Kanni adu) (with 10 highest p values)**

| Term | Count | P value |
| --- | --- | --- |
| Coenzyme A biosynthesis | 3 | 2.47E-12 |
| DNA replication | 7 | 3.18E-10 |
| Cell cycle | 12 | 3.51E-05 |
| B cell activation | 34 | 3.89E-07 |
| ATP synthesis | 7 | 4.22E-08 |
| Endothelial signalling pathway | 34 | 6.05E-07 |
| Dopamine receptor mediated signalling pathway | 11 | 7.56E-09 |
| Circadian clock system | 5 | 8.74E-06 |
| Carnitine metabolism | 3 | 9.03E-11 |
| De novo purine biosynthesis | 14 | 0.0001334567 |

**Table S3.2 KEGG pathways of genes found to be selected in Eastern Himalayan Region (Assam Hill)(with 10 highest p values)**

| Term | Count | P value |
| --- | --- | --- |
| Coenzyme linked carnitine metabolism | 4 | 1.47E-12 |
| EGF receptor signalling pathway | 32 | 4.18E-10 |
| Human immunodeficiency virus 1 infection | 64 | 4.51E-05 |
| Glutamatergic synapse | 61 | 5.89E-07 |
| Pathways in cancer | 121 | 6.12E-08 |
| Endocytosis | 50 | 6.35E-07 |
| CCKR signalling map | 127 | 7.56E-09 |
| Toll-like receptor signaling pathway | 34 | 8.74E-06 |
| Hepatitis B | 24 | 9.03E-11 |
| B cell activation | 54 | 0.0001334567 |

**Table S3.3 KEGG pathways of genes found to be selected in Western Himalayan Region (Changthangi and Uttarakhand local) (with 10 highest p values)**

| Term | Count | P value |
| --- | --- | --- |
| Fructose galactose metabolism | 32 | 6.83E-08 |
| GABA-B receptor II signaling | 15 | 2.81E-06 |
| Gamma-aminobutyric acid synthesis | 24 | 6.94E-06 |
| GBB signaling pathway | 13 | 2.39E-05 |
| General transcription by RNA polymerase I | 65 | 4.59E-05 |
| General transcription regulation | 11 | 5.50E-05 |
| Glycolysis | 24 | 6.93E-05 |
| Gonadotropin-releasing hormone receptor pathway | 5 | 1.21E-04 |
| Hedgehog signaling pathway | 14 | 1.28E-04 |
| Heme biosynthesis | 11 | 1.54E-04 |

**Table S3.4 KEGG pathways of genes found to be selected in Trans-Gangetic Plains Region, Central Plateau and Hills Region (Marwari and Jakhrana) (with 10 highest p values)**

| Term | Count | P value |
| --- | --- | --- |
| Phagosome | 26 | 1.79E-07 |
| Natural killer cell mediated cytotoxity | 32 | 1.92E-06 |
| Salivary secretion | 16 | 2.99E-06 |
| Arginine biosynthesis | 12 | 2.67E-05 |
| Beta1 adrenergic receptor signalling pathway | 24 | 2.83E-05 |
| Blood coagulation | 15 | 2.85E-05 |
| Enkephalin release | 13 | 3.74E-05 |
| FAS signalling pathway | 31 | 5.81E-05 |
| FGF signalling pathway | 14 | 6.67E-05 |
| JAK-STAT signalling pathway | 29 | 9.03E-05 |

**Table S3.5 KEGG pathways of genes found to be selected in Gujarat Plains and Hills Region( Kahmi and Surti) (with 10 highest p values)**

| Term | Count | P value |
| --- | --- | --- |
| Heterotrimeric G-protein signaling pathway-rod outer segment phototransduction | 22 | 3.51E-05 |
| PDGF signalling pathway | 43 | 4.72E-05 |
| Histamine H2 receptor mediated signaling pathway | 12 | 1.69E-04 |
| Huntington disease | 54 | 5.08E-04 |
| Hypoxia response via HIF activation | 21 | 5.32E-04 |
| Inflammation mediated by chemokine and cytokine signaling pathway | 32 | 6.24E-04 |
| Insulin/IGF pathway-mitogen activated protein kinase kinase/MAP kinase cascade | 14 | 9.48E-04 |
| mRNA splicing | 17 | 0.001118171 |
| Alanine biosynthesis | 21 | 0.001135413 |
| Ras Pathway | 28 | 0.001354505 |

**Table S3.6 KEGG pathways of genes found to be selected in Eastern Plateau and hill region (Jharkhand Black)(with 10 highest p values)**

| Term | Count | P value |
| --- | --- | --- |
| Sulfate assimilation | 12 | 4.82E-05 |
| Synaptic vesicle trafficking | 27 | 1.70E-04 |
| T cell activation | 2 | 2.44E-04 |
| TCA cycle | 9 | 2.60E-04 |
| Vitamin B6 metabolism | 26 | 2.67E-04 |
| Vitamin D metabolism and pathway | 31 | 3.31E-04 |
| Wnt signaling pathway | 17 | 4.03E-04 |
| Xanthine and guanine salvage pathway | 8 | 6.38E-04 |
| Triacylglycerol metabolism | 13 | 8.12E-04 |
| Angiogenesis | 10 | 8.78E-04 |

**Table S3.7 KEGG pathways of genes found to be selected in Western Plateau and Hills Region (Sangamneri) (with 10 highest p values)**

| Term | count | P value |
| --- | --- | --- |
| Acetate Utilization | 10 | 1.47E-12 |
| Vasopressin synthesis | 17 | 2.18E-10 |
| Apoptosis signalling pathway | 14 | 4.51E-05 |
| Vitamin B6 metabolism | 4 | 6.89E-07 |
| P13-Akt signalling pathway | 6 | 9.22E-08 |
| Wnt signaling pathway | 5 | 0.0000434543 |
| Cholinergic synapse | 23 | 0.0000674587 |
| Adherens junction | 15 | 0.0000734567 |
| Human papilloma virus infection | 8 | 0.0001334436 |
| Aldosterone synthesis and secretion | 12 | 0.00033345621 |

**Table S4: Pathways identified in animals underlying adaptation**

| **S. No.** | **Pathway** | **No. of genes** | **Genes** | **References** |
| --- | --- | --- | --- | --- |
| 1 | **cell-cell adhesion** | 32 | PRKCH, PTPN11, KDR, SOS1, DVL3, FGFR1, FRZB, CRYAB, PDGFRA, HSPB2, GRB14, PDGFC, PLA2G4A, FGF1, MAP2K2, PIK3CA, PLD1, RHOA, PRKCQ, CRYAA, NCK1 CCT6A, TRAP1, HSPA4, DNAJB11, AHSA1, PFDN2, PFDN4, PFDN5, PFDN6, PPID, CCT4 | Feder & Hofmann, (1999); Srikanth et al., (2017) |
| 3 | **GTPase regulator activity** | 6 | CHN1, TBC1D12, PLCB1, ARHGEF12, DENND1A, PREX2 | Bos et al., 2001; Yan et al., 2013 |
| 4 | **Mitochondrial Electron Transport, NADH to Ubiquinone** | 5 | NDUFB8, NDUFA7, NDUFS6, NDUFC2, NDUFV2 | Maloyan et al., (2005) |
| 5 | **Insulin signaling pathway** | 12 | RPS6, PDE3B, PHKB, SLC2A4, SORBS1, CBL, PRKCZ, SOCS2, RPTOR, SOCS3, PRKAR1A, GRB2 | Tang, J. et al., (2024) |
| 6 | **Glycolysis** | 5 | HK1, PFKL, PFKM, PKLR, BPGM | Maloyan et al., (2005) |
| 7 | **Heme biosynthesis** | 4 | RSAD1, EARS2, UROS, COX10 |  | |
| 8 | **HIF-1 signaling pathway** | 16 | PDHA2, NOS2, EPAS1, IFNGR2, RPS6, PRKCA, IGF1, EGFR, LDHB, BCL2, PLCG2, TEK, VHL, EIF4E2, EIF4E, PDK1 | Maloyan et al., (2005); Li et al., (2022), Koloi et al., 2025 | |
| 9 | **Rap1 signaling pathway** | 8 | VEGFC, PRKCA, IGF1, PLCB3, KITLG, EVL, TEK, PFN1 |  | |
| 10 | **MAPK pathway** | 12 | FGF5, RPS6KA4, FGF7, DUSP10, FGF8, FGF9, RRAS, PDGFD, MYC, CACNG1, MAP2K4, PDGFRA | Srikanth et al., (2017); Bernabucci et al., (2002) | |
| 11 | **VEGF signaling pathway** | 19 | PIK3C2G, PIK3R1, SPHK1, PIK3CD, KRAS, PRKCE, PRR5, PRKCA, PIK3R3, PRKCI, ETS1, PRKCH, KDR, HSPB2, PLA2G4A, MAP2K2, PIK3CA, PRKCQ, CRYAA | Parvaresh et al., (2010); Cao et al., (2014); Huang et al., (2021), (Li, et al. 2013). | |
| 12 | **Toll receptor signaling pathway** | 14 | TMEM189, TLR3, IRAK4, TICAM1, MAPK10, UBE2V1, NFKB1, TLR6, TLR10, MAP2K1, MAP3K1, MAPK9, IKBKB, MAP2K2 | Zhang, Z. et al., (2022), Liu et al., (2023) | |

**Table S5: SNP location and missense variation along with respective SIFT scores**

| **List of variant** | **Location** | **Gene** | **Symbol** | **Amino acid position** | **Amino acid Variation** | **SIFT score and prediction** |
| --- | --- | --- | --- | --- | --- | --- |
| rs668639882 | 5:2918383 | ENSCHIG00000034117 | - | 234 | E/H | Deleterious (0.01) |
| rs671855402 | 16:76174519 | ENSCHIG00000022485 | PTPRC | 276 | D/V | Deleterious (0.02) |
| rs654749491 | 1:24183878 | ENSCHIG00000011313 | - | 345 | R/H | Deleterious (0.02) |
| rs545434669 | 2:69430837 | ENSCHIG00000021081 | - | 111 | R/H | Deleterious (0.01) |
| rs642318023 | 19:29232114 | ENSCHIT00000040847 | MYH2 | 1470 | A/T | Deleterious  (0) |
| rs358639880 | 23:3168753 | ENSCHIG00000011328 | - | 290 | A/T | Deleterious  (0) |
| rs638110874 | 5:48019676 | ENSCHIG00000026015 | - | 557 | E/M | Deleterious (0.02) |
| rs672140726 | 5:41824628 | ENSCHIT00000040350. | CPNE8 | 168 | C/Y | Deleterious  (0) |
| rs662728418 | 18:29183833 | ENSCHIG00000026032 | **-** | 664 | H/S | Deleterious (0.03) |
| rs665960855 | 13:1246064 | ENSCHIG0000001810 | PLCB1 | 196 | R/H | Deleterious (0.01) |
| rs640516304 | 18:1661681 | ENSCHIT00000015224 | PRP6 | 233 | R/Q | Deleterious (0.05) |
| rs638301210 | 5:61499284 | ENSCHIG00000039843 | APAF1 | 464 | H/R | Deleterious (0.03) |
| rs658404508 | 9:50076344 | ENSCHIT00000026827 | CGA | 108 | T/S | Deleterious (0.04) |
| rs665366902 | 3:111227590 | ENSCHIT00000023090 | LY9 | 161 | S/P | Deleterious (0.01) |
| rs637000438 | 2:28315113 | ENSCHIT00000016466 | LRRC66 | 275 | V/M | Deleterious  (0) |

**Table S6: Genes and their reported functions**

| **Gene Name** | **Description** | **Function** | **Reference** |
| --- | --- | --- | --- |
| PTPRC | Protein tyrosine phosphatase receptor typeC | (Immunity)PTP has been shown to be an essential regulator of T- and B-cell antigen receptor signalling | Wiener et al., 2021 |
| MYH2 | Myosin heavy chain 2 | (Muscle Development)  Skeletal muscle myosin heavy chain IIA) | Madigan N.N ., 2021; Oatmen, K., 2021 |
| CPNE8 | copine 8 | (Fertility)Copine 8 may have an important role to play in prostate regulation and development | Maitra , R ., 2003; Caudell , E.G., 2000 |
| PLCB1 | Phospholipase C beta 1 | (HeatTolerance)Intracellular transduction of many extracellular signals | Peng, W., 2024;  Aboul-Naga A. M., 2022; Wiener et al., 2021  Li et al., 2020 |
| PRP6 | Prolactin-related protein-6 | Prolactin (PRL) signaling pathway; Expression in in highly fertile goats | Chen, Y., 2024  Linzer, DI, & Nathans, D., 1985; |
| APAF1 | Apoptotic peptidase activating factor 1 | (Fertility) maintai nreproductive efficiency | Adams, A. H., et al., (2012) |
| CGA | glycoprotein hormones, alpha polypeptide | (Litter size) Function as a regulatory step in the processing and association of glycoprotein hormone subunits to yield intact hormone (follicle - stimulating hormone secretion) | Wang K.,et al., 2024 |
| LY9 | lymphocyte antigen 9 | Ly9 glycoprotein is a member of the immunoglobulin (Ig) superfamily, which is expressed on the cell surface of B and T lymphocytes | Tovar, V., et al., 2000 |
| LRRC66 | leucine rich repeat containing 66 | *LRRC66* is a key gene for insulin metabolism, innate immunity and the nervous system | Ng et al., 2011;  Lien et al., 2020 |
