# Supplementary material for: Mapping Genomic Adaptation to Environmental Heterogeneity in Indian Native Goat Populations through Landscape Genomics
Source: Research Square preprint supplement (doi:10.21203/rs.3.rs-7508489/v1), 2025-09-08
Supplement: Supplementary file 2 [file db7909c68014596752352dcc.docx]

**SUPPLEMENTARY FIGURES**

*Size of the circle is relative of the number of Variants identified;

**Figure 1 : The Venn diagram showing number of shared variants between different groups according to different agro-climatic zone.**


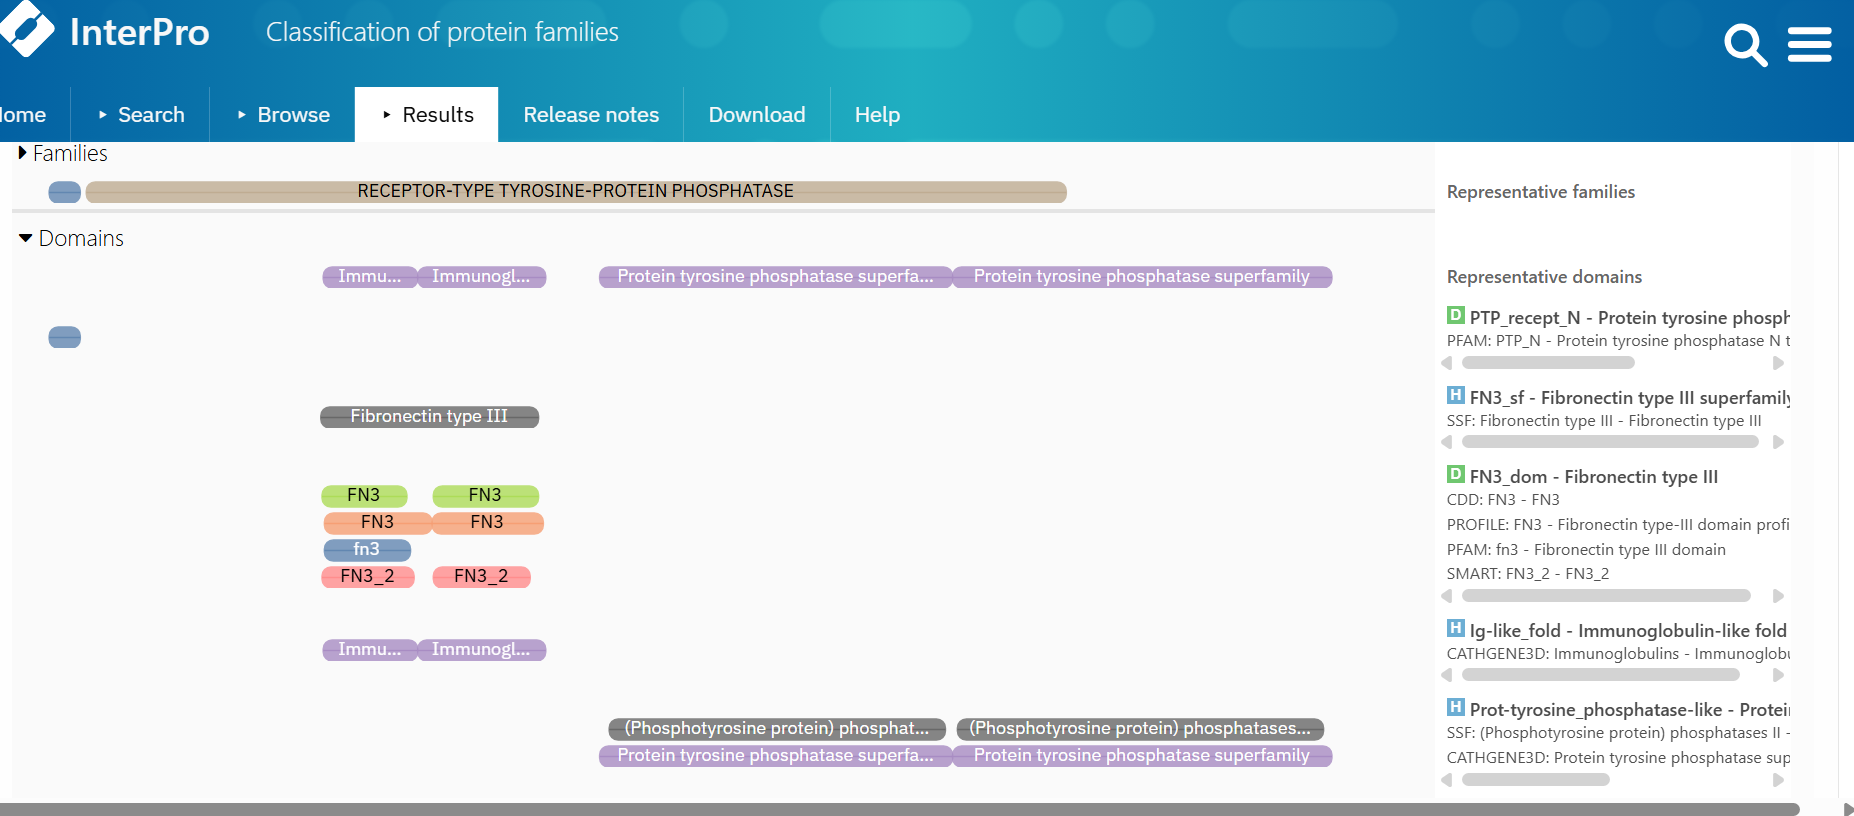


**Figure 2:** **Functional domain of PTPRC which is FNIII as predicted by Interpro**


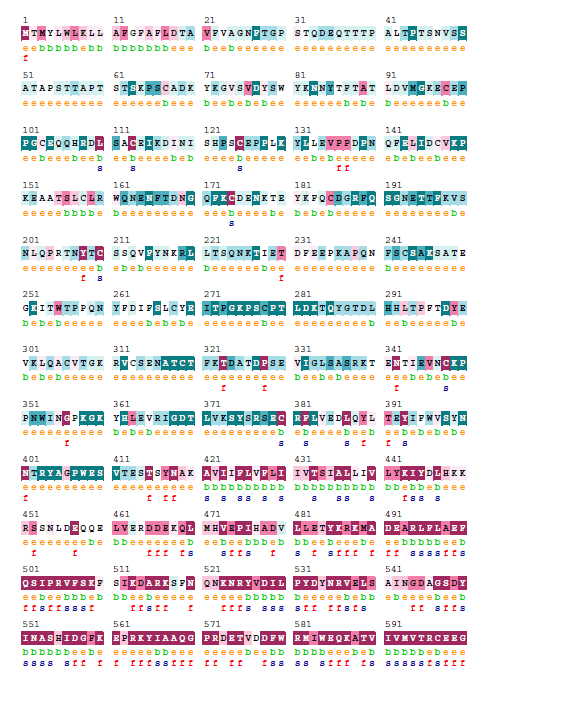


**Figure 3** **Consurf sequence of PTPRC Protein indicating conserved score at 76 position**

**
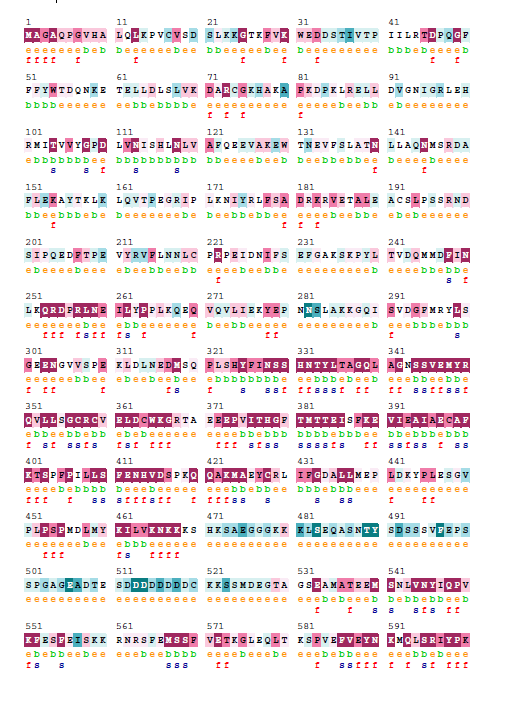
**

**Figure 4 Consurf sequence of PLCB1 Protein indicating non- conserved score at 196**
